# Supplementary material
Source: Springer Nature journal article supplement (https://www.springermedizin.de/resource/supplementary/12947_2007_156_MOESM1_ESM.pdf/9556350)

**Incidence of the primary endpoint (%)**

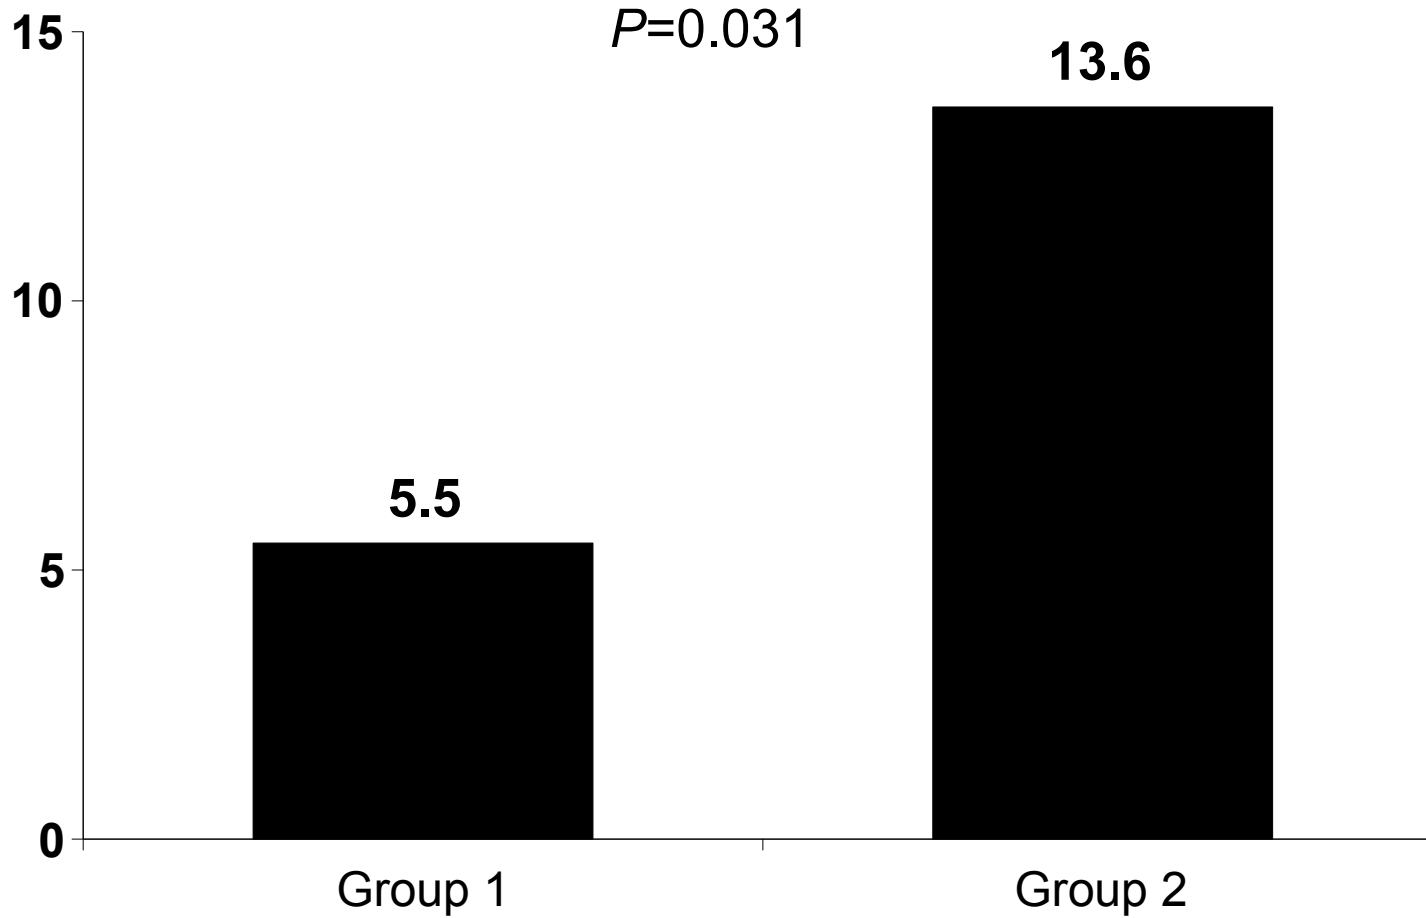

Supplement: MOESM1 [file 9556350]
